# Supplementary material
Source: publisher figshare collection journal article supplement (https://sage.figshare.com/ndownloader/files/14569421)
Supplement: Supplementary file 1 [file 14569421]

"[REDACTED]" Customer Survey

- 1) How many times have you eaten at "██████████" before we introduced our new pricing scheme?  
☐ Never    ☐ 1-5 times    ☐ 6-10 times    ☐ more than 10 times
- 2) How would you rate the quality of the meal you had:  
☐0 ☐1 ☐2    ☐3    ☐4    ☐5    ☐6    ☐7    ☐8    ☐9    ☐10  
poor                      average                      excellent
- 3) How did the meal compare to your expectations?  
☐−3    ☐−2    ☐−1    ☐0    ☐+1    ☐+2    ☐+3  
much worse                      as expected                      much better  
than expected                      than expected
- 4) Have you been to "██████████" since we introduced the Pay-What-You-Want scheme?  
☐ Yes    ☐ No  
If yes, how many times? \_\_\_\_\_
- 5) Did you know about the pricing scheme of "██████████" before coming? ☐ Yes ☐ No
- 6) Would you prefer to have regular prices set by the owner?    ☐ Yes ☐ No  
Any comments  
\_\_\_\_\_
- 7) Estimate the total cost of the meal you had today:    € \_\_\_\_\_
- 8) How much do you think you would have paid for your meal today if the owner set the prices? €  
\_\_\_\_\_
- 9) Have you discussed how much to pay for your meal with others at your table? ☐ Yes    ☐ No
- 10) Generally, I tend to respond badly to people who treat me unfairly or try to take advantage of me.  
☐0    ☐1    ☐2    ☐3    ☐4    ☐5    ☐6    ☐7    ☐8    ☐9    ☐10  
Strongly Strongly  
disagree agree
- 11) Generally, I tend to be nice to people who treat me nicely.  
☐0    ☐1    ☐2    ☐3    ☐4    ☐5    ☐6    ☐7    ☐8    ☐9    ☐10  
Strongly Strongly  
disagree agree
- 12) Age: \_\_\_\_\_
- 13) Gender:    ☐ M    ☐ F
- 14) Place of residence: ☐ This city    ☐ Other: \_\_\_\_\_
- 15) Education:    ☐ Less than high school degree    ☐ High school degree  
                      ☐ Bachelor degree                      ☐ Graduate degree

## APPENDIX B – STUDY 2

### **(High–Low Uncertainty Food) × (High-Low Uncertainty Process) between-subjects design**

In the next screens you will be presented with a hypothetical scenario related to eating out at restaurants. Please read carefully and try to imagine that you are in the described situations. Respond as truthfully as you can based on the information provided.

#### **Scenario 1 (low process-low food uncertainty):**

Imagine that you go out for dinner to a family-owned restaurant of an average price range in your town or city.

You have heard that the service process in the restaurant in terms of friendliness, waiting time and atmosphere is generally fairly pleasant and enjoyable.

You are not very hungry and simply want to eat a large starter plate, such as a large Greek salad. The waiter presents you with a menu of freshly prepared starter plates and says that you can see the starter plates from a display counter. You check out the starter plates in the display and decide the one that you prefer. When you are back at your table, the waiter takes your order and will later bring you the chosen plate together with a bread basket.

The restaurant is running a new pricing mechanism in which you are entirely free to decide how much you want to pay for the meal (including zero). You have to make your payment decision **BEFORE** you have your meal.

Based on this description, what is the amount you would decide to pay?

#### **Scenario 2 (low process-high food uncertainty):**

Imagine that you go out for dinner to a family-owned restaurant of an average price range in your town or city.

You have heard that the service process in the restaurant in terms of friendliness, waiting time and atmosphere is generally fairly pleasant and enjoyable.

You are not very hungry and simply want to eat a large starter plate, such as a large Greek salad. The waiter presents you with a menu of freshly prepared starter plates. You check out the starter plates in the written menu and ask for the one that you prefer. The waiter takes your order and will later bring you the chosen plate together with a bread basket.

The restaurant is running a new pricing mechanism in which you are entirely free to decide how much you want to pay for the meal (including zero). You have to make your payment decision **BEFORE** you have your meal.

Based on this description, what is the amount you would decide to pay?

#### **Scenario 3 (high process-low food uncertainty):**

Imagine that you go out for dinner to a family-owned restaurant of an average price range in your town or city.

You have heard that the service process in the restaurant in terms of friendliness, waiting time and atmosphere can vary a lot. Whereas on average the service process in the restaurant is



□1    □2    □3    □4    □5    □6    □7

Very uncertain Very certain

□1    □2    □3    □4    □5    □6    □7

Poor                      Average                      Excellent

|      |    |    |         |    |    |           |    |
|------|----|----|---------|----|----|-----------|----|
|      | □1 | □2 | □3      | □4 | □5 | □6        | □7 |
| Poor |    |    | Average |    |    | Excellent |    |

---

£ \_\_\_\_\_
